# Supplementary material for: Interference with the retinoic acid signalling pathway inhibits the initiation of teeth and caudal primary scales in the small-spotted catshark Scyliorhinus canicula
Source: PeerJ journal article supplement (doi:10.7717/peerj.15896), 2023-09-06

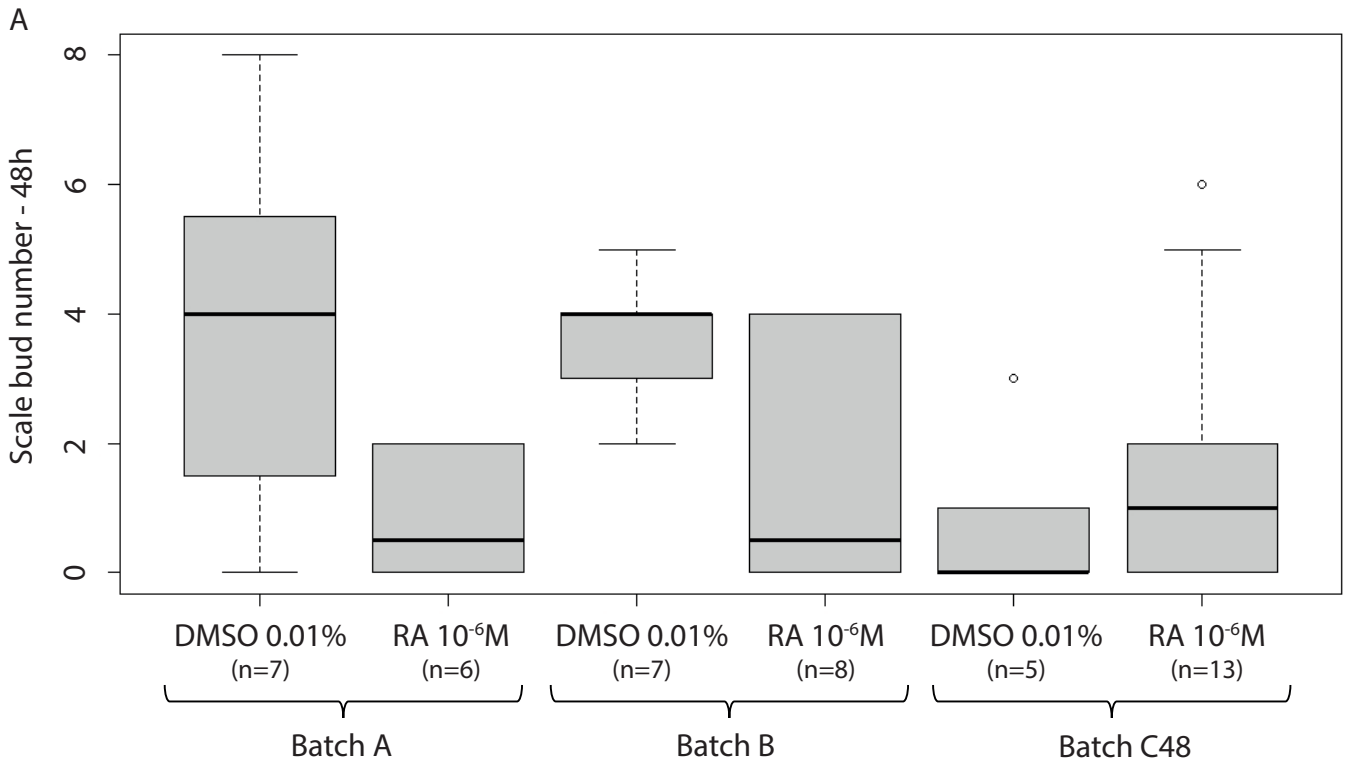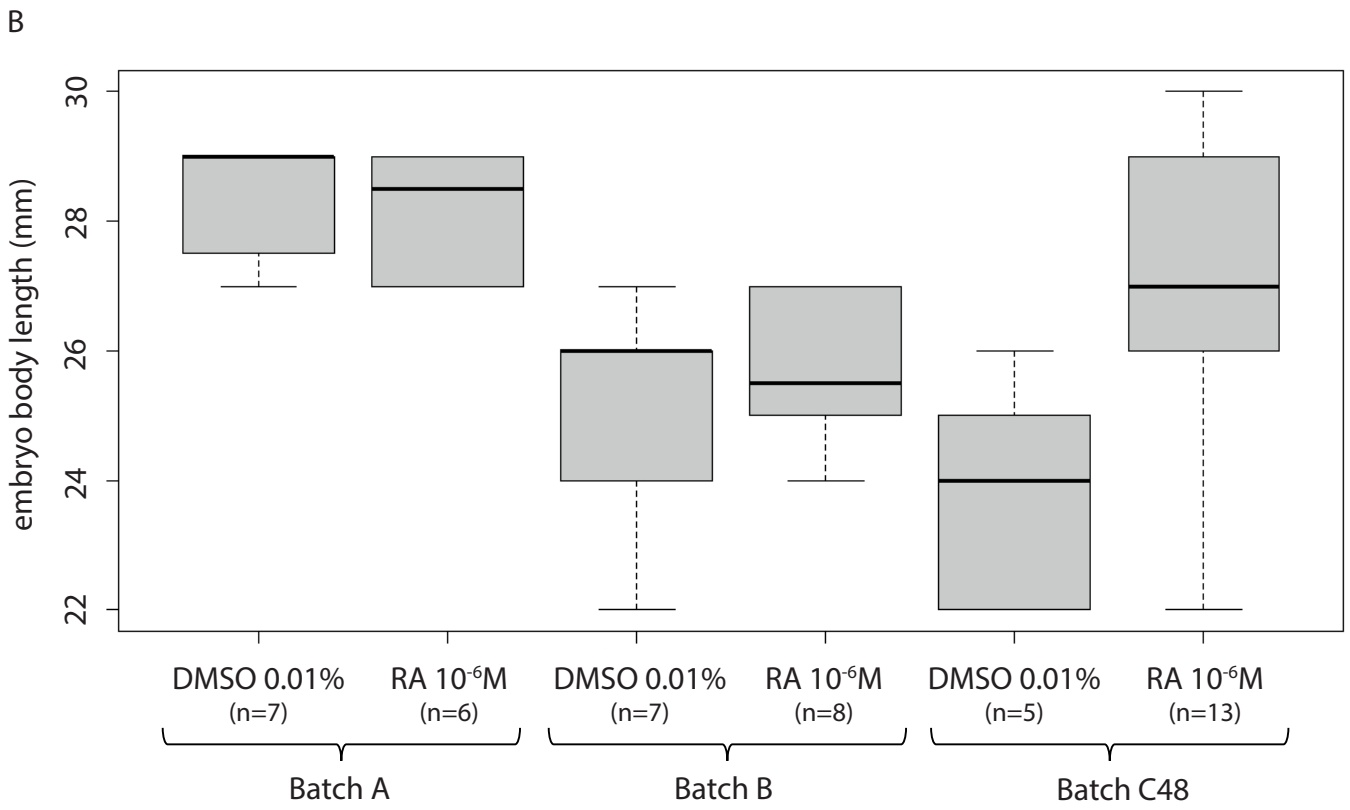

Supplement: Figure_S4-R1.pdf [file Figure_S4-R1.pdf]
