# Supplementary material for: Interference with the retinoic acid signalling pathway inhibits the initiation of teeth and caudal primary scales in the small-spotted catshark Scyliorhinus canicula
Source: PeerJ. 2023 Sep 6;11:e15896. doi: 10.7717/peerj.15896 (PMC10492535; doi:10.7717/peerj.15896)
Supplement: Supplemental Information 6 — Set of forward and reverse primers for selected genes and size of amplified fragment (Sequences are given in the 5′-3′ orientation). The experiments for which the primers were used are listed in the last column. [file peerj-11-15896-s006.xlsx]

## Sheet: Feuil1
Gene	forward	reverse	amplicon size (bp)	Experiment
ScAldh1a1	TGCTCGAAACATCCCCTTGG	AGTGCAGTGAGTGGAGTCTG	830	Amplification
ScAldh1a2	pSPORT1 vector internal primer	pSPORT1 vector internal primer	~1747	RNA probe synthesis
ScAldh1a2	CCGTCTCCAACAGCGAATCT	GTTCGGGCTCTTTCCTCCAA	801	Amplification
scAldh1a3	ACCATTCATGCTGCCACTCT	AAAGTGCTGTGAGGGGTGTC	772	Amplification
ScCyp26a1	TCTCAGTTCCAGGATGCTCTG	TTGTCCACTGGGTATACAGTA	666	Amplification+RNA probe synthesis
ScCyp26b1	TGCAGACGTTCGAGTTGGACG	pSPORT1 vector internal primer	~516	RNA probe synthesis
ScCyp26b1	CTGCAGACGTTCGAGTTGGA	TCCCGTGAATTTCTCCCGTC	642	Amplification
ScCyp26c1	CAAGGCGACTCAGGACATCGA	AGCGCGCTGTTGTGCTCAGT	681	Amplification+RNA probe synthesis
ScRara	AACCAACAGCAGTTCGTGCA	CCTGTTCAACGTAAGGCCAT	874	Amplification+RNA probe synthesis
ScRarb	GACTGTATGGATGTTCTCGC	GAGCAGAGTGATCTGATCTG	846	Amplification+RNA probe synthesis
ScRarg	GAGTACCAGCTCGGAGGAG	CTTTGGCACTGATTCCTCTC	974	Amplification
ScRxra	ACTGATTCCACCGTGAGGTC	GTCTCTGTCTTGGGCTCGAC	773	Amplification
ScRxrb	AACTCGCCCATCAGTATTGG	GCTCATTCCAACCTGCTCTC	829	Amplification+RNA probe synthesis
ScRxrg	ATTGTTACAGCCCCAACTCG	GTCCCCAATCAGCTTGAAAA	956	Amplification+RNA probe synthesis
