# Supplementary material for: Interference with the retinoic acid signalling pathway inhibits the initiation of teeth and caudal primary scales in the small-spotted catshark Scyliorhinus canicula
Source: PeerJ. 2023 Sep 6;11:e15896. doi: 10.7717/peerj.15896 (PMC10492535; doi:10.7717/peerj.15896)
Supplement: Supplemental Information 7 — RA treatments are shown in blue, DEAB treatments in gradations of orange depending on the concentrations used and DMSO controls in white. Each embryo is identified and the batch to which it belongs is indicated. Batches A to K were treated at different times of the year but under identical conditions for the same pharmacological treatment. Note that C48 indicates the embryos of batch C treated for 48h and C72, those treated for 72 h. ND: damaged samples for which the number of tooth or scale buds could not be determined, n: number of samples for which a number of tooth or scale buds could be determined (i.e., without ND). [file peerj-11-15896-s007.xlsx]

## Sheet: Feuil1
	Count results of scale buds															Count results of tooth buds
	RA 10-6M/DMSO 0.01% 48h					RA 10-6M/DMSO 0.01% 72h					DEAB 10-4M/DMSO 0.1%					RA 10-6M/DMSO 0.01%					DEAB 10-5M/DMSO 0.01%					DEAB 5x10-5M/DMSO 0.05%
	treatment	sample n°	batch	body length (mm)	scale buds	treatment	sample n°	batch	body length (mm)	scale buds	treatment	sample n°	batch	body length (mm)	scale buds	treatment	sample n°	batch	body length (mm)	tooth buds	treatment	sample n°	batch	body length (mm)	tooth buds	treatment	sample n°	batch	body length (mm)	tooth buds
	DMSO (n = 19) average number of buds =2,89	1	A	27	4	DMSO (n = 8) average number of buds=4,50	1	C72	26	2	DMSO (n = 21) average number of buds=3,81	1	D	21	0	DMSO (n = 23) average number of buds=29,91	1	G	50	26	DMSO (n = 15) average number of buds=26,47	1	J	47	24	DMSO (n = 14) average number of buds=29,43	1	J	44	24
		2	A	27	2		2	C72	29	4		2	D	26	2		2	G	51	27		2	J	48	29		2	J	46	29
		3	A	28	1		3	C72	21	3		3	D	26	4		3	G	52	29		3	K	45	15		3	J	47	30
		4	A	29	5		4	C72	31	7		4	D	28	4		4	G	52	37		4	K	46	22		4	K	49	20
		5	A	29	0		5	C72	23	5		5	D	28	5		5	G	52	25		5	K	48	15		5	K	50	31
		6	A	29	8		6	C72	32	9		6	D	28	7		6	G	53	32		6	K	48	31		6	K	51	28
		7	A	29	6		7	C72	26	3		7	D	28	6		7	G	53	24		7	K	49	23		7	K	51	31
		8	A	ND	ND		8	C72	26	3		8	D	28.5	5		8	G	54	32		8	K	49	32		8	K	52	35
		9	B	22	3		9	C72	ND	ND		9	E	26	0		9	G	54	23		9	K	50	22		9	K	52	30
		10	B	23	2	RA (n = 13) average number of buds=2,46	1	C72	26	1		10	E	28	4		10	G	58	31		10	K	52	28		10	K	53	30
		11	B	25	5		2	C72	24	2		11	E	28	5		11	H	45	17		11	K	52	35		11	K	55	32
		12	B	26	4		3	C72	24	0		12	E	27	5		12	H	50	37		12	K	52	27		12	K	55	36
		13	B	26	3		4	C72	25	0		13	E	27	4		13	H	51	23		13	K	53	33		13	K	55	27
		14	B	26	4		5	C72	26	1		14	E	27.5	0		14	H	58	36		14	K	56	33		14	K	56	29
		15	B	27	4		6	C72	31	3		15	E	28	5		15	I	45	17		15	K	57	28	DEAB (n = 15) average number of buds=19,33	1	J	40	25
		16	C48	22	0		7	C72	23	1		16	E	31	6		16	I	49	29	DEAB (n = 19) average number of buds=23,95	1	J	39	24		2	J	42	22
		17	C48	25	0		8	C72	27	5		17	E	ND	ND		17	I	51	35		2	J	41	17		3	J	43	25
		18	C48	24	1		9	C72	27	6		18	F	23	1		18	I	51	32		3	J	43	21		4	J	44	16
		19	C48	25	0		10	C72	29	5		19	F	23	6		19	I	51	29		4	J	45	29		5	J	44	17
		20	C48	26	3		11	C72	24	0		20	F	25	3		20	I	54	38		5	J	45	22		6	K	37	12
	RA (n = 27) average number of buds=1,48	1	A	28	0		12	C72	30	8		21	F	26	3		21	I	54	43		6	J	46	19		7	K	37	17
		2	A	27	0		13	C72	27	0		22	F	29	5		22	I	55	27		7	J	47	30		8	K	38	15
		3	A	27	0		14	C72	ND	ND	DEAB (n = 27) average number of buds=4,37	1	D	21	2		23	I	55	39		8	J	47	34		9	K	43	13
		4	A	29	2							2	D	23	4	RA (n = 18) average number of buds=14,78	1	G	41	22		9	J	49	24		10	K	44	24
		5	A	29	1							3	D	23	3		2	G	45	6		10	J	49	24		11	K	45	19
		6	A	29	2							4	D	24	5		3	G	45	7		11	J	49	26		12	K	45	17
		7	A	ND	ND							5	D	26	5		4	G	46	6		12	J	50	26		13	K	46	19
		8	A	ND	ND							6	D	26	5		5	G	49	15		13	J	50	23		14	K	47	24
		9	B	26	0							7	D	26	6		6	G	49	11		14	J	50	33		15	K	49	25
		10	B	25	0							8	D	27	5		7	G	50	17		15	K	44	10
		11	B	25	0							9	D	26	6		8	G	50	16		16	K	48	29
		12	B	25	1							10	D	26	6		9	G	52	11		17	K	48	19
		13	B	24	0							11	D	26	5		10	G	53	27		18	K	49	22
		14	B	27	4							12	D	26	7		11	G	56	32		19	K	50	23
		15	B	27	4							13	D	25	3		12	H	45	0
		16	B	27	4							14	D	ND	ND		13	H	45	6
		17	C48	24	0							15	E	27	5		14	H	48	8
		18	C48	26	0							16	E	26	6		15	H	50	15
		19	C48	26	0							17	E	27	4		16	H	55	21
		20	C48	27	0							18	E	24	5		17	I	43	13
		21	C48	29	1							19	E	27	7		18	I	50	33
		22	C48	29	2							20	E	28	7
		23	C48	22	0							21	F	22	2
		24	C48	29	3							22	F	25	3
		25	C48	29	5							23	F	24	3
		26	C48	29	2							24	F	23	4
		27	C48	26	1							25	F	24	1
		28	C48	26	2							26	F	22	3
		29	C48	30	6							27	F	23	3
												28	F	24	3
