# Supplementary material for: Interference with the retinoic acid signalling pathway inhibits the initiation of teeth and caudal primary scales in the small-spotted catshark Scyliorhinus canicula
Source: PeerJ. 2023 Sep 6;11:e15896. doi: 10.7717/peerj.15896 (PMC10492535; doi:10.7717/peerj.15896)
Supplement: Supplemental Information 8 — RA treatments are shown in blue, DEAB treatments in gradations of orange depending on the concentrations used and DMSO controls in white. Tails of embryos treated with 48 h (batch B) or 72 h (batch C72) RA 10−6M and embryos of batch D treated with DEAB 10−4M were transversely sectioned to identify stages of scale morphogenesis. The dorsal scale buds on the right and left sides were considered. For tooth morphogenesis, all the batches were considered. For each bud, dental or scale, the developmental stage is specified (LM, ED or LD). ND: damaged samples for which the developmental stage of buds could not be determined, n: number of samples on which the histological analysis was performed (i.e., without ND). [file peerj-11-15896-s008.xlsx]

## Sheet: Feuil1
	Histological analysis of scale buds																		Histological analysis of tooth buds
	RA 10-6M/DMSO 0.01% 48h						RA 10-6M/DMSO 0.01% 72h						DEAB 10-4M/DMSO 0.1%						RA 10-6M/DMSO 0.01%						DEAB 10-5M/DMSO 0.01%						DEAB 5x10-5M/DMSO 0.05%
	treatment	sample n°	batch	LM	ED	LD	treatment	sample n°	batch	LM	ED	LD	treatment	sample n°	batch	LM	ED	LD	treatment	sample n°	batch	LM	ED	LD	treatment	sample n°	batch	LM	ED	LD	treatment	sample n°	batch	LM	ED	LD
	DMSO (n = 5)	9	B	2	4	0	DMSO (n = 8)	1	C72	4	0	0	DMSO (n = 5)	2	D	ND	ND	ND	DMSO (n = 22)	1	G	10	5	11	DMSO (n = 15)	1	J	12	9	3	DMSO (n = 5)	1	J	11	9	4
		10	B	ND	ND	ND		2	C72	2	2	4		3	D	ND	ND	ND		2	G	6	9	12		2	J	11	8	10		2	J	10	12	7
		11	B	4	4	0		3	C72	4	2	0		4	D	3	2	2		3	G	5	8	16		3	K	7	8	0		3	J	10	10	10
		12	B	ND	ND	ND		4	C72	3	4	7		5	D	2	3	4		4	G	4	12	21		4	K	7	12	3		4	K	11	8	1
		13	B	3	2	0		5	C72	2	3	4		6	D	5	4	4		5	G	2	8	15		5	K	10	5	0		5	K	14	9	8
		14	B	2	3	2		6	C72	3	4	9		7	D	5	0	6		6	G	7	11	14		6	K	9	13	9		6	K	10	12	6
		15	B	2	2	4		7	C72	2	0	3		8	D	3	3	4		7	G	3	9	12		7	K	8	10	5		7	K	14	10	7
	RA (n = 4)	11	B	ND	ND	ND		8	C72	1	2	2	DEAB (n = 10)	1	D	ND	ND	ND		8	G	9	5	17		8	K	15	8	9		8	K	14	12	9
		12	B	2	0	0	RA (n = 8)	1	C72	2	0	0		2	D	ND	ND	ND		9	G	8	7	8		9	K	8	10	4		9	K	11	11	8
		14	B	4	2	1		2	C72	2	2	0		3	D	2	4	0		10	G	4	4	23		10	K	4	13	11		10	K	12	10	8
		15	B	2	4	1		5	C72	2	0	0		4	D	4	2	4		11	H	8	7	2		11	K	14	10	11		11	K	10	8	14
		16	B	3	2	2		6	C72	3	3	0		5	D	4	3	3		12	H	7	7	23		12	K	9	12	6		12	K	12	11	13
								7	C72	ND	ND	ND		6	D	3	3	3		13	H	6	0	17		13	K	12	11	10		13	K	6	11	10
								8	C72	4	2	4		7	D	5	2	4		14	H	8	8	20		14	K	8	15	10		14	K	11	8	10
								9	C72	2	2	7		8	D	2	6	2		15	I	11	4	2		15	K	2	8	18	DEAB (n = 10)	1	J	11	9	5
								10	C72	1	2	6		9	D	4	7	0		16	I	12	6	11	DEAB (n = 19)	1	J	11	9	4		2	J	6	11	5
								12	C72	3	5	8		10	D	4	3	4		17	I	15	5	15		2	J	7	10	0		3	J	8	8	9
								14	C72	ND	ND	ND		11	D	2	4	4		18	I	11	10	11		3	J	7	10	4		4	J	6	4	6
														12	D	5	4	5		19	I	6	12	11		4	J	10	11	8		5	J	8	7	2
														13	D	ND	ND	ND		20	I	7	6	25		5	J	9	11	2		6	K	5	7	0
																				21	I	9	9	25		6	J	9	10	0		7	K	15	2	0
																				22	I	7	7	13		7	J	17	4	9		8	K	12	3	0
																				23	I	ND	ND	ND		8	J	13	11	10		9	K	10	3	0
																			RA (n = 17)	1	G	9	8	5		9	J	10	4	10		10	K	13	5	6
																				2	G	5	1	0		10	J	8	9	7		11	K	10	9	0
																				3	G	6	1	0		11	J	9	9	8		12	K	9	6	2
																				4	G	6	0	0		12	J	6	12	8		13	K	5	13	1
																				5	G	7	6	2		13	J	6	7	10		14	K	9	11	4
																				6	G	7	4	0		14	J	14	12	7		15	K	10	10	5
																				7	G	7	10	0		15	K	9	1	0
																				8	G	5	8	3		16	K	13	11	5
																				9	G	6	5	0		17	K	6	12	1
																				10	G	14	4	9		18	K	7	10	5
																				11	G	10	9	13		19	K	6	10	7
																				14	H	5	1	0
																				15	H	6	2	0
																				16	H	6	7	2
																				17	H	5	8	8
																				18	I	4	5	4
																				19	I	10	11	12
