# Supplementary material for: Interference with the retinoic acid signalling pathway inhibits the initiation of teeth and caudal primary scales in the small-spotted catshark Scyliorhinus canicula
Source: PeerJ. 2023 Sep 6;11:e15896. doi: 10.7717/peerj.15896 (PMC10492535; doi:10.7717/peerj.15896)
Supplement: Supplemental Information 9 — Assignment of a score between 0 and 4, according to the 8 developmental criteria defined in figure S2 for 40 reference embryos classified by body length from 40 to 58 mm (5 embryos per size class). The 8 scores are summed to obtain a total score per embryo. All embryos treated with RA or DEAB as well as the respective DMSO controls, for which a number of teeth could be determined, were analyzed using the same procedure. A darker green color was assigned as the score increased. We observed that in control embryos smaller than 50 mm, very few cells were stained, resulting in a majority of low scores. For the RA and DEAB treatments, although the embryos are smaller than their respective controls, their number of unstained cells is very low, suggesting that the body length does not reflect the developmental progression during the treatments. cfp: caudal fin pigmentation, dfp: dorsal fin pigmentation, dhp: dorsal head pigmentation, dp: dorsal pigmentation, g: gills filament regression, pfe: pigmentation at the front of the eye, rp: retinal pigmentation dorsal view, srp: shape and retinal pigmentation of the eye. ND: data not available because the embryo was used in another experiment. [file peerj-11-15896-s009.xlsx]

## Sheet: scores
	Encoding of reference embryos											Encoding of treated embryos
	no treatment											RA 10-6M/DMSO 0.01%													DEAB 10-5M/DMSO 0.01%													DEAB 5x10-5M/DMSO 0.05%
	sample n°	body length (mm)	rp	dhp	g	dp	pfe	srp	dfp	cfp	final score	treatment	sample n°	batch	body length (mm)	rp	dhp	g	dp	pfe	srp	dfp	cfp	final score	treatment	sample n°	batch	body length (mm)	rp	dhp	g	dp	pfe	srp	dfp	cfp	final score	treatment	sample n°	batch	body length (mm)	rp	dhp	g	dp	pfe	srp	dfp	cfp
	1	40	0	0	0	0	0	0	0	1	1	DMSO	1	G	50	2	1	1	1	1	3	2	3	14	DMSO	1	J	47	1	0	2	1	1	2	2	1	10	DMSO	1	J	44	2	0	1	1	1	2	0	1
	2	40	0	0	0	0	0	0	0	1	1		2	G	51	2	1	0	1	1	3	1	1	10		2	J	48	2	0	2	1	1	3	1	3	13		2	J	46	2	0	2	1	1	2	0	1
	3	40	0	0	0	0	0	0	0	0	0		3	G	52	2	1	1	1	1	3	2	2	13		3	K	45	2	0	2	1	0	3	0	1	9		3	J	47	2	1	2	1	1	2	2	1
	4	40	0	0	0	0	0	0	0	1	1		4	G	52	2	2	1	2	2	3	2	3	17		4	K	46	2	0	1	1	1	2	0	1	8		4	K	49	1	0	2	1	0	2	0	1
	5	40	0	0	0	0	0	0	0	1	1		5	G	52	2	1	0	1	1	2	1	3	11		5	K	48	2	0	2	1	0	3	0	1	9		5	K	50	2	2	1	1	1	3	3	3
	1	43	0	0	0	0	0	0	0	1	1		6	G	53	2	2	0	2	2	3	3	3	17		6	K	48	2	1	2	1	1	3	2	3	15		6	K	51	2	1	1	1	1	3	2	3
	2	43	0	0	0	0	0	0	0	1	1		7	G	53	2	1	0	1	1	3	2	3	13		7	K	49	1	0	1	0	0	1	1	1	5		7	K	51	2	1	2	1	1	3	2	3
	3	43	0	0	0	0	0	0	0	1	1		8	G	54	ND										8	K	49	2	1	2	1	1	3	1	3	14		8	K	52	2	0	2	1	1	3	1	2
	4	43	0	0	0	0	0	0	0	1	1		9	G	54	1	1	0	1	1	2	1	2	9		9	K	50	2	0	2	1	0	2	1	3	11		9	K	52	2	1	2	1	1	3	2	3
	5	43	0	0	0	0	0	0	0	1	1		10	G	58	2	1	1	1	1	3	2	3	14		10	K	52	2	1	1	1	1	3	3	3	15		10	K	53	1	0	1	1	1	2	0	1
	1	45	1	0	0	1	0	1	0	1	4		11	H	45	1	0	0	1	1	2	1	2	8		11	K	52	2	2	2	2	1	3	3	3	18		11	K	55	2	1	2	1	2	3	3	3
	2	45	0	0	0	0	0	0	0	1	1		12	H	50	2	2	1	2	2	3	3	3	18		12	K	52	2	1	2	1	1	3	2	3	15		12	K	55	2	1	2	1	1	3	2	3
	3	45	0	0	0	0	0	0	0	1	1		13	H	51	2	1	0	1	1	2	2	3	12		13	K	53	2	0	1	1	0	3	1	2	10		13	K	55	2	1	2	1	1	3	2	2
	4	45	0	0	0	0	0	1	0	1	2		14	H	58	2	2	1	2	2	4	3	3	19		14	K	56	2	1	1	1	1	3	0	1	10		14	K	56	2	0	1	1	1	3	1	1
	5	45	0	0	0	0	0	1	0	1	2		15	I	45	0	0	1	1	1	1	0	1	5		15	K	57	2	2	1	2	2	3	3	3	18	DEAB	1	J	40	2	0	1	1	1	2	2	1
	1	48	1	0	0	0	0	1	0	1	3		16	I	49	2	1	2	1	2	4	1	1	14	DEAB	1	J	39	0	0	2	1	1	1	1	3	9		2	J	42	1	0	2	0	0	2	0	1
	2	48	1	0	0	0	0	1	0	1	3		17	I	51	2	2	2	2	2	3	2	3	18		2	J	41	0	0	2	1	1	0	0	1	5		3	J	43	0	0	1	1	1	1	2	2
	3	48	1	0	0	0	0	1	0	2	4		18	I	51	2	0	2	1	1	3	1	1	11		3	J	43	1	1	2	1	1	2	2	1	11		4	J	44	1	0	2	1	1	2	1	1
	4	48	0	0	0	0	0	0	0	2	2		19	I	51	2	0	2	1	1	3	0	1	10		4	J	45	2	1	2	1	1	2	0	1	10		5	J	44	0	0	1	0	0	0	1	1
	5	48	0	0	0	0	0	0	0	1	1		20	I	54	2	2	2	2	2	4	3	3	20		5	J	45	2	2	1	2	2	2	1	2	14		6	K	37	0	0	2	1	0	0	1	3
	1	50	1	0	0	0	0	1	0	1	3		21	I	54	2	2	2	1	2	4	2	3	18		6	J	46	2	1	2	1	1	3	1	3	14		7	K	37	0	0	2	0	0	1	1	1
	2	50	2	1	1	1	2	2	2	3	14		22	I	55	2	2	2	2	2	4	2	3	19		7	J	47	2	1	2	1	1	2	2	2	13		8	K	38	0	0	1	0	0	0	0	1
	3	50	1	0	1	0	0	1	1	3	7		23	I	55	2	0	2	1	1	3	2	1	12		8	J	47	1	2	2	2	1	2	2	3	15		9	K	43	0	0	2	1	1	1	0	3
	4	50	2	0	1	1	0	1	0	1	6	RA	1	G	41	2	2	2	2	1	4	3	3	19		9	J	49	1	2	1	2	2	2	2	2	14		10	K	44	1	0	2	1	0	1	0	1
	5	50	2	0	0	1	0	2	0	1	6		2	G	45	2	0	0	0	0	3	0	1	6		10	J	49	2	2	0	2	2	2	2	1	13		11	K	45	2	0	2	1	1	2	2	2
	1	52	2	0	2	0	1	3	1	2	11		3	G	45	1	1	0	1	1	2	0	1	7		11	J	49	2	2	2	2	2	3	3	3	19		12	K	45	1	0	2	1	1	2	1	1
	2	52	2	0	2	1	1	3	0	2	11		4	G	46	1	0	0	1	1	2	0	1	6		12	J	50	1	0	2	1	1	2	2	2	11		13	K	46	1	0	1	1	1	2	2	1
	3	52	2	0	1	1	2	3	1	3	13		5	G	49	ND										13	J	50	1	0	2	1	1	2	0	1	8		14	K	47	1	0	2	1	1	2	0	1
	4	52	2	0	1	0	0	3	0	2	8		6	G	49	1	1	0	1	1	2	2	3	11		14	J	50	2	1	2	1	1	3	1	1	12		15	K	49	0	0	2	1	1	1	1	2
	5	52	2	0	1	0	0	1	1	2	7		7	G	ND	ND										15	K	44	1	0	2	0	0	2	0	1	6
	1	55	2	1	1	1	1	2	2	2	12		8	G	50	2	2	0	2	1	4	3	3	17		16	K	48	2	1	2	1	1	2	2	3	14
	2	55	2	1	1	1	1	3	2	3	14		9	G	52	2	1	0	1	0	3	1	1	9		17	K	48	1	0	2	1	0	2	1	2	9
	3	55	2	1	1	1	1	2	2	2	12		10	G	53	2	2	0	2	2	3	3	3	17		18	K	49	1	0	2	1	1	2	1	1	9
	4	55	2	0	1	1	2	3	1	1	11		11	G	56	2	2	0	2	2	3	3	3	17		19	K	50	0	0	2	1	1	1	0	1	6
	5	55	2	1	1	1	1	3	2	3	14		13	H	45	1	0	0	1	1	2	2	1	8
	1	58	2	2	1	2	2	4	2	3	18		14	H	45	0	0	0	0	0	1	0	1	2
	2	58	2	2	1	2	2	4	2	3	18		15	H	48	1	0	0	1	1	2	1	1	7
	3	58	2	2	2	2	2	4	2	3	19		16	H	50	2	2	0	2	1	3	2	3	15
	4	58	2	1	2	1	1	4	2	3	16		17	H	55	2	2	0	2	2	4	2	2	16
	5	58	2	2	1	2	2	4	2	3	18		18	I	43	2	0	2	1	1	3	3	1	13
													19	I	50	2	2	2	2	1	4	1	3	17
[truncated: 1 more columns]
